# Supplementary material for: 3′ end additions by T7 RNA polymerase are RNA self-templated, distributive and diverse in character—RNA-Seq analyses
Source: PubMed Central journal article supplement — Nucleic Acids Res. 2018 Sep 14;46(18):9253–63. doi: 10.1093/nar/gky796 (PMC6182178; doi:10.1093/nar/gky796), 2018-09-14

## Supplementary Material

### **3' end additions by T7 RNA polymerase are RNA self-templated, distributive, and diverse in character – RNA-Seq analyses**

Yasaman Gholamalipour<sup>1</sup>, Aruni Karunanayake Mudiyansele<sup>1</sup>, and Craig T. Martin<sup>1,\*</sup>

<sup>1</sup> Department of Chemistry, University of Massachusetts Amherst, Amherst, MA, 01003, USA

\* To whom correspondence should be addressed. Tel: +1 413 545 3299; Fax: +1 413 545 4490;

Email: cmartin@chem.umass.edu

#### **Table of contents:**

**Table S1.** Sequences used for transcription in this study

**Table S2.** Sequences for RNA-Seq library preparation

**Table S3.** Illumina primers for TruSeq Small RNA Library

**Table S4.** Summary of sequence data populations for each RNA-Seq data set

**Figure S1.** Flow chart of *RNA-Seq sample preparation* and initial data processing

**Figure S2.** Comparison of the most abundant 3' end heterogeneities

**Figure S3.** Estimation of *cis* vs *trans* initiated distributions

**Figure S4.** Lane profile traces of electrophoretic data in Figures 5B and 6B

**Table S1.** Sequences used for transcription in this study

| DNA                 | Sequences                                                    |
|---------------------|--------------------------------------------------------------|
| Non-template        | 5' - <u>AATTAATACGACTCACTATAGG</u> -3'                       |
| 5N template         | 3' - <u>TTAATTATGCTGAGTGATATCCNNNNNCATCTCCACTTCTAAAT</u> -5' |
| 5N-U→A template     | 3' - <u>TTAATTATGCTGAGTGATATCCNNNNNCATCTCCTCTTCTAAAT</u> -5' |
| 5N-UG→AC template   | 3' - <u>TTAATTATGCTGAGTGATATCCNNNNNCATCTCCTGTTCTAAAT</u> -5' |
| 3N template         | 3' - <u>TTAATTATGCTGAGTGATATCCTCNNGATGCAGCTGCGTAAAT</u> -5'  |
| 3N-G→U template     | 3' - <u>TTAATTATGCTGAGTGATATCCTCNNGATGCAGATGCGTAAAT</u> -5'  |
| Synthetic 24mer RNA | 5' -GGAAUAAGUAGAGGUGAAGAUUUA-3'                              |

T7 promoter sequences are underlined

**Table S2.** Sequences for RNA-Seq library preparation

| Oligo for:            | Name                                     | Sequences (5' to 3' direction)           |
|-----------------------|------------------------------------------|------------------------------------------|
| 3'Adapter Ligation    | 3' adapter (all)                         | P-TGGAATTCTCGGGTGCCAAGG-Biotin           |
| 5' Adapter Ligation   | 5' adapter for 3N (high yield)           | GUUCAGAGUUCUACAGUCCGACGAUC <u>UAAUCA</u> |
|                       | 5' adapter for 5N (low yield)            | GUUCAGAGUUCUACAGUCCGACGAUC <u>UACUUA</u> |
|                       | 5' adapter for 5N (high yield)           | GUUCAGAGUUCUACAGUCCGACGAUC <u>ACAUA</u>  |
|                       | 5' adapter for synthetic RNA (low yield) | GUUCAGAGUUCUACAGUCCGACGAUC <u>AUAUCC</u> |
| Reverse Transcription | RT-Primer (all)                          | GCCTTGGCACCCGAGAATTCCA                   |

Designed barcode sequences for each 5' adapter are underlined

**Table S3.** Illumina primers for TruSeq Small RNA Library

| Oligo for:     | Application                     | Sequences (5' to 3' direction)                                            |
|----------------|---------------------------------|---------------------------------------------------------------------------|
| Forward Primer | all                             | AATGATACGGCGACCACCGAGATCTACACGTTCTCAGAGTTCTACAGTCCGA                      |
| Reverse Primer | 3N<br>(high yield)              | CAAGCAGAAGACGGCATAACGAGAT <u>ACATCGGT</u> GACTGGAGTTCCTTGGCACCCGAGAATTCCA |
|                | 5N<br>(low yield)               | CAAGCAGAAGACGGCATAACGAGAT <u>ATTGGCGT</u> GACTGGAGTTCCTTGGCACCCGAGAATTCCA |
|                | 5N<br>(high yield)              | CAAGCAGAAGACGGCATAACGAGAT <u>GGAACI</u> GTGACTGGAGTTCCTTGGCACCCGAGAATTCCA |
|                | Synthetic<br>RNA<br>(low yield) | CAAGCAGAAGACGGCATAACGAGAT <u>CTCTAC</u> GTGACTGGAGTTCCTTGGCACCCGAGAATTCCA |

**Table S4.** Summary of sequence data populations for each RNA-Seq data set.

Experiments were multiplexed (typically, 10 per sequencing run), as a single sequencing run yields far more sequence reads than necessary for this study. The first data column below is the actual percentage that the indicated sequence set represents in the larger sequencing run. Runs were not multiplexed equally, as sequences with more complexity (e.g. randomization) warrant deeper reads.

The remaining columns are labeled as in the lower right of the Figure S1 flow chart, and as in that chart, follow on each other, left to right. "Raw Seq Reads" were trimmed of adapters (only sequences with *both* 5' and 3' adapters were retained), then filtered to remove primer dimers and single base inserts, and were finally filtered to analyze only reads that begin with the expected initial sequence GG.

For the promoter driven transcription reactions (*i.e.*, all except "24mer"), abortive products represent the majority of captured products ("GG starts"), as typically observed in gel electrophoresis. As they are not the focus of this study, they were removed by filtering for only sequences 15 bases in length or longer. For 3' end analyses, sequences were further aligned to an encoded upstream sequence beginning at position +10, which adjusts for mis-initiation or slippage in the first few bases of the transcript.

|                           | Percent in Multiplex | Raw Seq Reads | Adapter Trimmed | Trimmed | GG starts | ≥15mer | ≥15mer & align |
|---------------------------|----------------------|---------------|-----------------|---------|-----------|--------|----------------|
| 5N (low yield)            | 6.9%                 | 36,026        | 24,752          | 23,706  | 20,626    | 6,193  | 5,905          |
| 5N (high yield)           | 25.2%                | 130,900       | 91,932          | 85,488  | 47,356    | 19,283 | 17,350         |
| 5N (high yield) replicate | 9.9%                 | 92,929        | 74,784          | 70,973  | 33,967    | 14,725 | 13,412         |
| 24mer (low yield)         | 3.9%                 | 37,206        | 25,322          | 21,880  | 1,442     | 1,218  | 1,162          |
| 3N (high yield)           | 10.3%                | 96,796        | 71,068          | 67,112  | 33,353    | 7,702  | 7,177          |

Mapped reads '≥15mer' have been deposited in the Small Read Archive (SRA)

(<http://www.ncbi.nlm.nih.gov/sra>) with the BioProject accession code PRJNA486161, with entries SAMN09839052 (5N low yield), SAMN09839053 (5N high yield), SAMN09839054 (5N high yield, Replicate), SAMN09839055 (24mer low yield), SAMN09839056 (3N high yield).

**Figure S1. Flow chart of *in vitro* transcription, followed by RNA-Seq data analysis.**

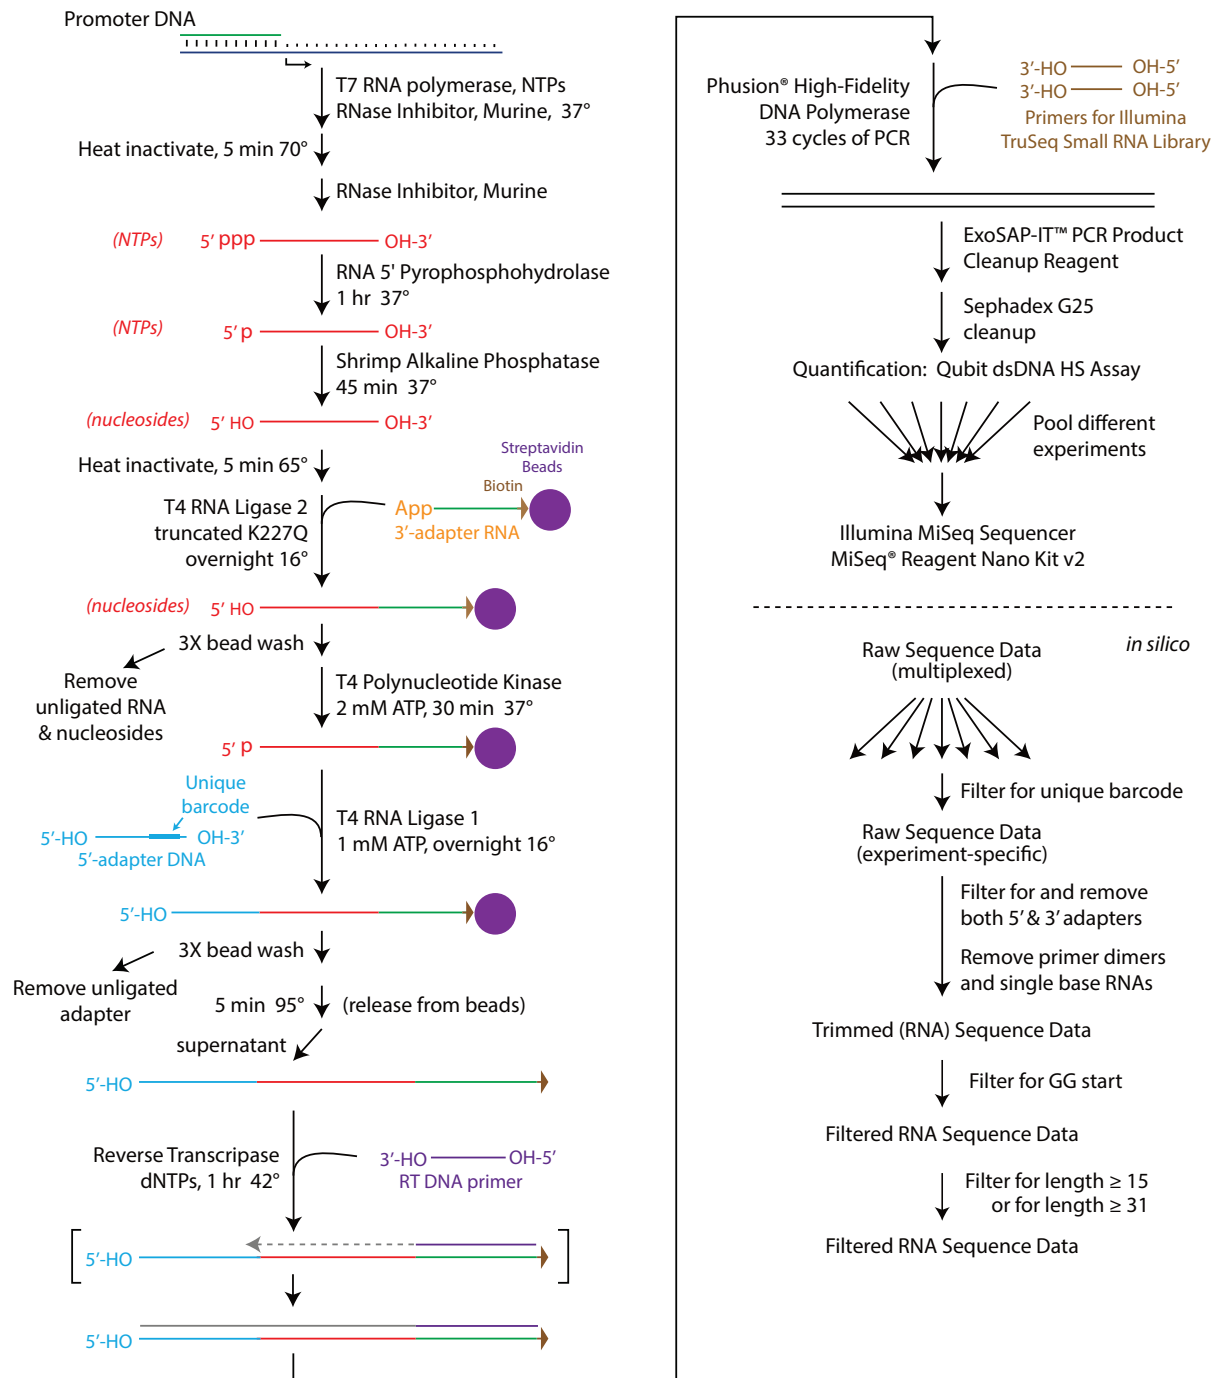

**Figure S2. Comparison of the most abundant 3' end heterogeneities.** A) the same data as in Figure 1C, high yield, but extended to sequences representing  $\geq 0.5\%$  of the pool and showing the actual counts of each sequence; B) a replicate run of that experiment, indicating very good reproducibility; C) the same data as in Figure 1C, low yield; D) the same data as in Figure 5D, using template 3N, which encodes a different sequence upstream of position +20. Comparison of (A or C) and (D) demonstrates that the identities of the 3' additions change significantly. The total number of sequence reads in the pool are shown at the bottom of each set.

The reader is cautioned that while the generally good agreement between replicates A and B indicates a high level of reproducibility in the assay, factors such as (reproducible) ligation bias likely contribute more to uncertainties and should limit subtle interpretations of the data.

| <b>A</b>                                                                  | <b>B</b>                                                                  | <b>C</b>                                                                 | <b>D</b>                                                                 |
|---------------------------------------------------------------------------|---------------------------------------------------------------------------|--------------------------------------------------------------------------|--------------------------------------------------------------------------|
| 5N high yield conditions                                                  | 5N high yield conditions - replicate                                      | 5N low yield conditions                                                  | 3N high yield conditions                                                 |
| Encoded: <u>AGAGGUGAAGAUUUU</u>                                           | Encoded: <u>AGAGGUGAAGAUUUU</u>                                           | Encoded: <u>AGAGGUGAAGAUUUU</u>                                          | Encoded: <u>ACGUCGACGCAUUUU</u>                                          |
| 1520 8.8% AGAGGUGAAGAUUUUAC                                               | 1346 10.0% AGAGGUGAAGAUUUUAC                                              | 1744 29.5% AGAGGUGAAGAUUUUAC                                             | 988 13.8% ACGUCGACGCAUUUUAC                                              |
| 1293 7.5% AGAGGUGAAGAUUUUUA                                               | 1002 7.5% AGAGGUGAAGAUUUUUA                                               | 1108 18.8% AGAGGUGAAGAUUUUUA                                             | 837 11.7% ACGUCGACGCAUUUUAG                                              |
| 1214 7.0% AGAGGUGAAGAUUUUACC                                              | 941 7.0% AGAGGUGAAGAUUUUACC                                               | 728 12.3% AGAGGUGAAGAUUUU                                                | 639 8.9% ACGUCGACGCAUUUUUA                                               |
| 558 3.2% AGAGGUGAAGAUUUUAACA                                              | 529 3.9% AGAGGUGAAGAUUUUAACA                                              | 231 3.9% AGAGGUGAAGAUUUUAACA                                             | 456 6.4% ACGUCGACGCAUUUU                                                 |
| 522 3.0% AGAGGUGAAGAUUUUAACU                                              | 395 2.9% AGAGGUGAAGAUUUUAACU                                              | 187 3.2% AGAGGUGAAGAUUUUAACU                                             | 432 6.0% ACGUCGACGCA                                                     |
| 361 2.1% AGAGGUGAAGAUUUUAAC                                               | 342 2.5% AGAGGUGAAGAUUUUAAC                                               | 185 3.1% AGAGGUGAAGAUUUUAAC                                              | 411 5.7% ACGUCGACGCAUU                                                   |
| 335 1.9% AGAGGUGAAGAUUUUAACCU                                             | 315 2.3% AGAGGUGAAGAUUUUAACCU                                             | 169 2.9% AGAGGUGAAGAUUUUAACCU                                            | 281 3.9% ACGUCGACGCA                                                     |
| 335 1.9% AGAGGUGAAGAUUUUAAC                                               | 242 1.8% AGAGGUGAAGAUUUUAAC                                               | 141 2.4% AGAGGUG                                                         | 242 3.4% ACGUCGA                                                         |
| 320 1.8% AGAGGUGAAGAUUUUAACU                                              | 233 1.7% AGAGGUGAAGAUUUUAACU                                              | 127 2.2% AGAGGUGAAGAUUUUAACU                                             | 239 3.3% ACGUCGAC                                                        |
| 312 1.8% AGAGGUGAAGAUUUUAACCC                                             | 208 1.6% AGAGGUGAAGAUUUUAACCC                                             | 102 1.7% AGAGGUGAAGAUUUUAACCC                                            | 185 2.6% ACGUCGACGCAUUUUUA                                               |
| 253 1.5% AGAGGUGAAGAUUUUAAC                                               | 198 1.5% AGAGGUGAAGAUUUUAAC                                               | 92 1.6% AGAGGUGAAG                                                       | 180 2.5% ACGUCGACGCAUUUUUA                                               |
| 247 1.4% AGAGGUGAAGAUUUUAACCU                                             | 185 1.4% AGAGGUGAAGAUUUUAACCU                                             | 79 1.3% AGAGGUGAAGAUUUUAACCU                                             | 175 2.4% ACGUCGACG                                                       |
| 242 1.4% AGAGGUGAAGAUUUUAACCUACU                                          | 174 1.3% AGAGGUGAAGAUUUUAACCUACU                                          | 75 1.3% AGAGGUG                                                          | 166 2.3% ACGUCGACGCAUUUUUA                                               |
| 239 1.4% AGAGGUG                                                          | 167 1.2% AGAGGUG                                                          | 72 1.2% AGAGGUGAAG                                                       | 109 1.5% ACGUCGACGCAUUUUUA                                               |
| 222 1.3% AGAGGUGAAGAUUUUAACCUACU                                          | 164 1.2% AGAGGUGAAGAUUUUAACCUACU                                          | 69 1.2% AGAGGUGAAGAUUUUAACU                                              | 98 1.4% ACGUCGACGCAUUUUUA                                                |
| 220 1.3% AGAGGUGAAGAUUUUAACAC                                             | 154 1.1% AGAGGUGAAGAUUUUAACAC                                             | 61 1.0% AGAGGUGAAGAUUUUAAC                                               | 92 1.3% ACGUCG                                                           |
| 202 1.2% AGAGGUGAAGAUUUUAACCUA                                            | 154 1.1% AGAGGUGAAGAUUUUAACCUA                                            | 44 0.7% AGAGGUGAAGAUUUUAAC                                               | 59 0.8% ACGUCGACGCAU                                                     |
| 200 1.2% AGAGGUGAAGAUUUUAACCUACA                                          | 146 1.1% AGAGGUGAAGAUUUUAACCUACA                                          | 36 0.6% AGAGGUGA                                                         | 38 0.5% ACGUCGACGCAUUUUUA                                                |
| 199 1.1% AGAGGUGAAGAUUUUAACCU                                             | 143 1.1% AGAGGUG                                                          | 32 0.5% AGAGGUGAAGAUUUUAACG                                              |                                                                          |
| 181 1.0% AGAGGUGAAGAUUUUAACU                                              | 143 1.1% AGAGGUGAAGAUUUUAACU                                              | 5905 Sequences $\geq 15$ bases long and aligning to the sequence 'AGAGG' | 7177 Sequences $\geq 15$ bases long and aligning to the sequence 'ACGUC' |
| 180 1.0% AGAGGUGAAGAUUUUAAC                                               | 140 1.0% AGAGGUGAAGAUUUUAACCUACA                                          |                                                                          |                                                                          |
| 178 1.0% AGAGGUG                                                          | 127 0.9% AGAGGUGAAGAUUUUAACU                                              |                                                                          |                                                                          |
| 151 0.9% AGAGGUGAAGAUUUUAACCUA                                            | 111 0.8% AGAGGUGAAGAUUUUAACU                                              |                                                                          |                                                                          |
| 144 0.8% AGAGGUGAAGAUUUUAACU                                              | 111 0.8% AGAGGUGAAGAUUUUAACCUA                                            |                                                                          |                                                                          |
| 136 0.8% AGAGGUGAAGAUUUUAAC                                               | 109 0.8% AGAGGUGAAGAUUUUAACG                                              |                                                                          |                                                                          |
| 136 0.8% AGAGGUGAAGAUUUUAAC                                               | 108 0.8% AGAGGUGAAGAUUUUAACCUA                                            |                                                                          |                                                                          |
| 134 0.8% AGAGGUGAAGAUUUUAACU                                              | 104 0.8% AGAGGUGAAGAUUUUAACCU                                             |                                                                          |                                                                          |
| 127 0.7% AGAGGUGAAGAUUUUAACCU                                             | 100 0.7% AGAGGUGAAGAUUUUAAC                                               |                                                                          |                                                                          |
| 108 0.6% AGAGGUGAAGAUUUUAACCUA                                            | 95 0.7% AGAGGUGAAGAUUUUAAC                                                |                                                                          |                                                                          |
| 105 0.6% AGAGGUGAAGAUUUUAAC                                               | 85 0.6% AGAGGUGAAGAUUUUAACU                                               |                                                                          |                                                                          |
| 100 0.6% AGAGGUGAAGAUUUUAACG                                              | 83 0.6% AGAGGUGAAG                                                        |                                                                          |                                                                          |
| 90 0.5% AGAGGUGAAGAUUUUAAC                                                | 81 0.6% AGAGGUGAAGAUUUUAAC                                                |                                                                          |                                                                          |
|                                                                           | 75 0.6% AGAGGUGAAGAUUUUAAC                                                |                                                                          |                                                                          |
|                                                                           | 72 0.5% AGAGGUGAAGAUUUUAACU                                               |                                                                          |                                                                          |
| 17350 Sequences $\geq 15$ bases long and aligning to the sequence 'AGAGG' | 13412 Sequences $\geq 15$ bases long and aligning to the sequence 'AGAGG' |                                                                          |                                                                          |

**Figure S3. Estimation of *cis* vs *trans* initiated distributions.** In order to assess whether a transcript initiated from self-templating (*cis*) vs templating from another RNA (*trans*), we utilized the fact that the original DNA template encodes randomized bases from position +3 through +7. Following the flow chart below, data were filtered for only RNAs that read into that key sequence region, plus at least two bases beyond. A sequence is tagged as *cis* only if the (entire) sequence past the key sequence is the exact inverse complement of the corresponding region of the initial sequence. Note that the requirement for an exact sequence match likely *underestimates* the percentage of reactions that were *cis* in origin. True *cis*-derived transcripts that subsequently (distributively) add even one additional base are tagged as *trans*.

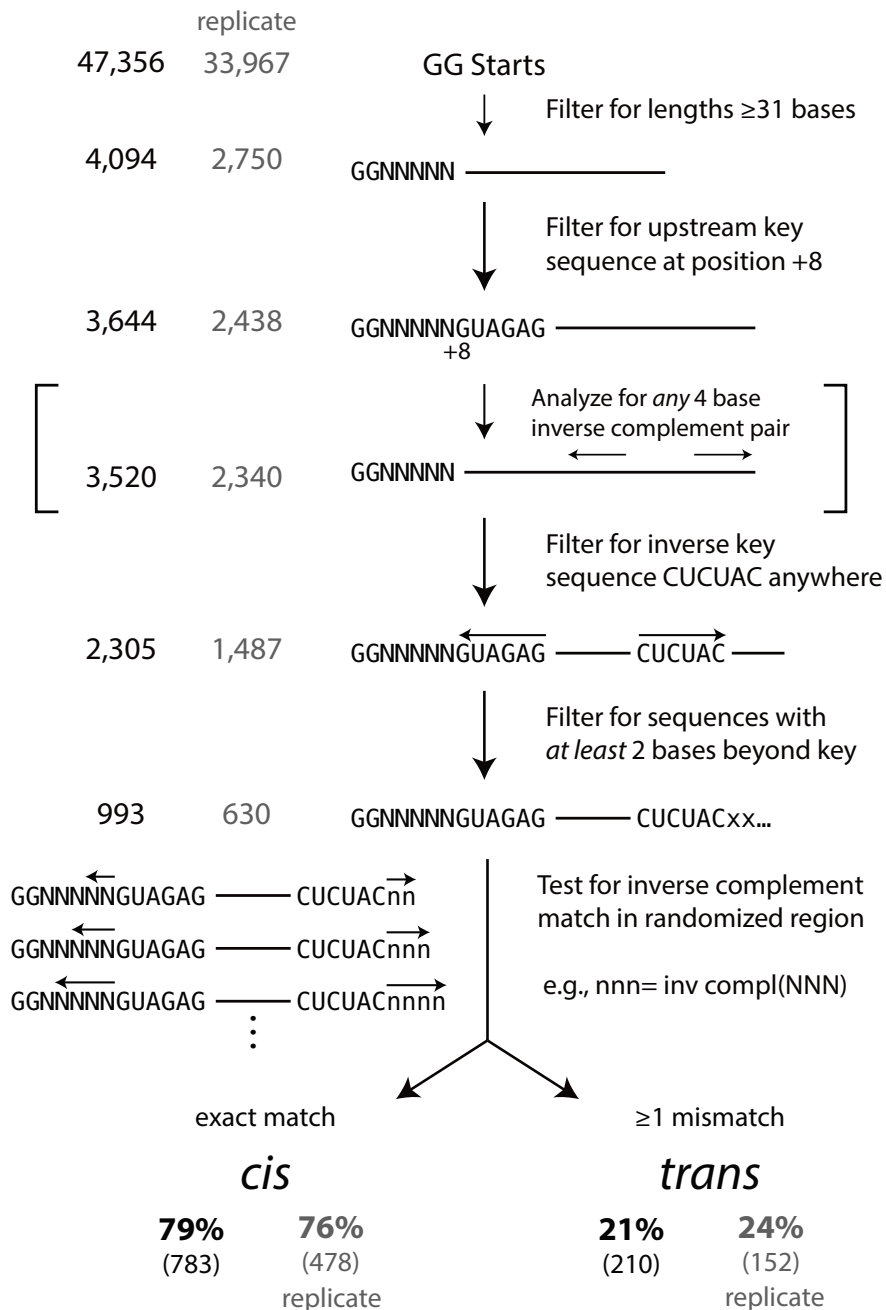

**Figure S4. Lane profile traces of electrophoretic data.** In order to allow more quantitative comparisons of the RNA gels in figures 5B and 6B, the following analyzes each lane for the relative amounts of each product (or range of products). As lanes were loaded differently, each trace is normalized to itself, allowing assessment of the relative amounts of encoded 24mer and longer primer-extended RNAs. Gels were analyzed using ImageJ v1.51. Note that “High 5N” and “High 3N” in Figure 5B and “5N” and “3N” in Figure 6B serve effectively as replicates, respectively.

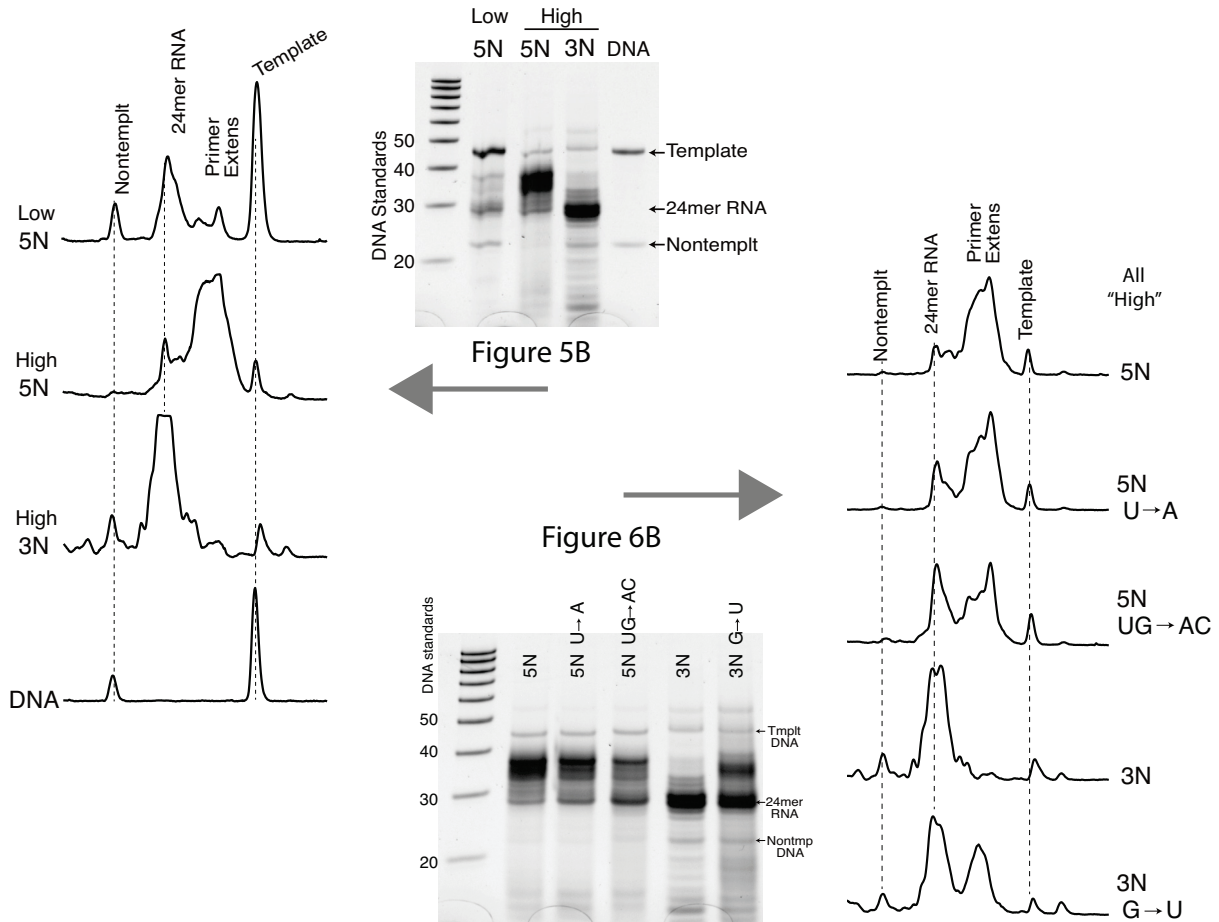

Supplement: gky796_supplemental_files.pdf [file gky796_supplemental_files.pdf]
